# Supplementary material for: Superoxide Dismutase 3 Limits Collagen-Induced Arthritis in the Absence of Phagocyte Oxidative Burst
Source: Hindawi journal article supplement (doi:10.1155/2012/730469), 2012-01-01

**Supplementary figure 1. The expression of SOD3 did not affect arthritis severity in the control paws.** Arthritis severity in the non-treated control paws was not affected in either wild type (A) or *Ncf1*<sup>\*/\*</sup> mice (B). Sum score of all three non-treated paws is presented for both genotypes. In wild type mice (Ade-SOD3 n=6, Ade-lacZ n=7) and in *Ncf1*<sup>\*/\*</sup> mice (Ade-SOD3 n=22, Ade-lacZ n=23).

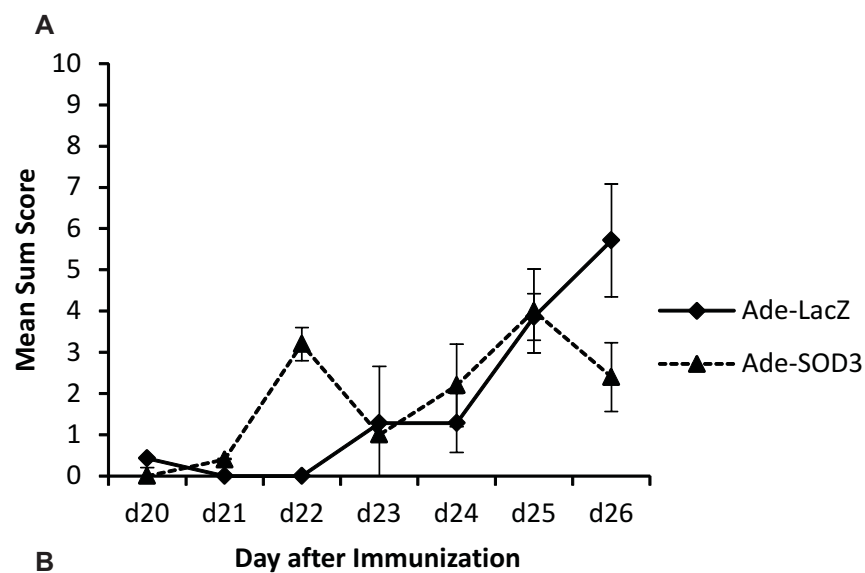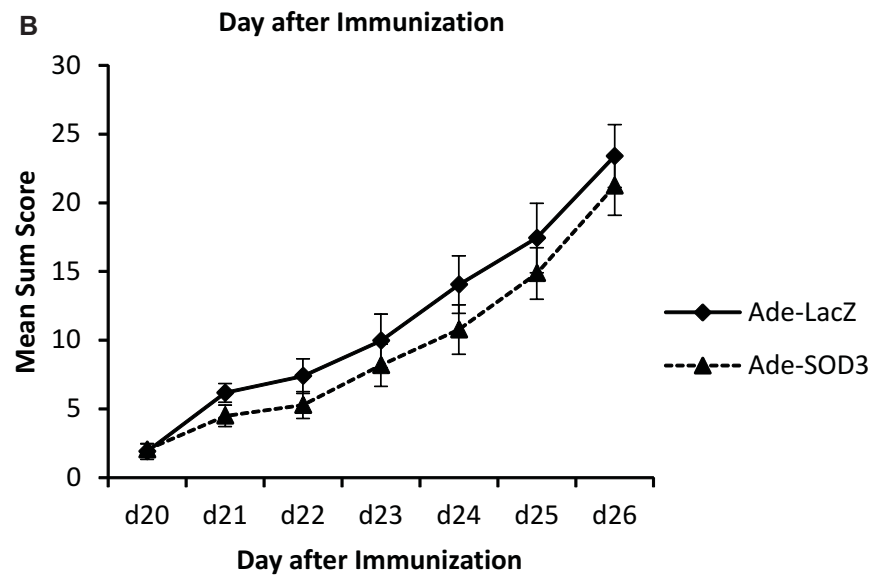

Supplement: f1 [file 730469.f1.pdf]
